# Supplementary material for: Multiplex Real-Time PCR Assay Targeting Eight Parasites Customized to the Korean Population: Potential Use for Detection in Diarrheal Stool Samples from Gastroenteritis Patients
Source: PubMed Central journal article supplement (PMC5115832; doi:10.1371/journal.pone.0166957), 2016-11-18
Supplement: pone.0166957.s003.pdf [file pone.0166957.s003.pdf]

**S1 Table. Details of amplification primers of the parasites for making positive controls**

| <b>Target organism</b>        | <b>Forward primer sequence (5'-3')</b> | <b>Reverse primer sequence (5'-3')</b> | <b>BLAST identity (%)</b> | <b>Target</b> | <b>Accession number of target sequence</b> |
|-------------------------------|----------------------------------------|----------------------------------------|---------------------------|---------------|--------------------------------------------|
| <i>Gymnophalloides seoi</i>   | TTTTGCCTGGTTTGAATAGTT                  | GCCACCACAAATCAAGTATCA                  | 380/380 (100%)            | CO1           | AF096234.3                                 |
| <i>Blastocystis hominis</i>   | GCTCGTCTCAAAGATTAAG                    | TGCCCTCCAATTGTTTATCG                   | 511/511 (100%)            | 18s rRNA      | EU482085.1                                 |
| <i>Cryptosporidium parvum</i> | TGTTGCATTCACTATGCCTGA                  | GGACTGAAATACAGGCATTATCTTG              | 533/533 (100%)            | Cowp 1        | AB089292.1                                 |
| <i>Giardia lamblia</i>        | AGATGATCA AGGACGCCATC                  | GACGAGCTTCGTGTTTGTGA                   | 464/464 (100%)            | beta-giardin  | XM_001705373.1                             |
| <i>Entamoeba histolytica</i>  | ATCTGGTTGATCCTGCCAGT                   | CCTCCTACTCATTCTTCAAGA                  | 540/540 (100%)            | 18s rRNA      | X65163.1                                   |
| <i>Metagonimus yokogawai</i>  | GTTGATTCTCCAGGGGTTT                    | CCATTATGGAGGCCGATAAG                   | 360/360 (100%)            | CO1           | AB470519.1                                 |
| <i>Clonorchis sinensis</i>    | GGTGGTTTGAGCTCATCATATGT                | CGAGTTCCAGCAAGCATATATAATC              | 360/360 (100%)            | CO1           | FJ381664.2                                 |

CO1 = cytochrome c oxidase subunit 1; Cowp = Cryptosporidium oocyst wall protein; DNA synthesis for *Dientamoeba fragilis* (GenBank: JQ677163.1) was requested to the Bioneer (Bioneer, Korea).
