# Supplementary material for: Multiplex Real-Time PCR Assay Targeting Eight Parasites Customized to the Korean Population: Potential Use for Detection in Diarrheal Stool Samples from Gastroenteritis Patients
Source: PubMed Central journal article supplement (PMC5115832; doi:10.1371/journal.pone.0166957), 2016-11-18
Supplement: pone.0166957.s004.pdf [file pone.0166957.s004.pdf]

**S2 Table.** The cross-reactivity test of the multiplex real-time PCR assay in relation to various microorganisms including 27 bacteria/candida, 11 parasites, and 16 viruses

| No . | Organisms | Name                              | Results | No . | Organisms | Name                                 | Results |
|------|-----------|-----------------------------------|---------|------|-----------|--------------------------------------|---------|
| 1    | Bacteria  | <i>Clostridium difficile</i>      | U.D.    | 28   | Parasites | <i>Ascaris lumbricoides</i>          | U.D.    |
| 2    |           | <i>Yersinia enterocolitica</i>    | U.D.    | 29   |           | <i>Enterobius vermicularis</i>       | U.D.    |
| 3    |           | <i>Salmonella typhimurium</i>     | U.D.    | 30   |           | <i>Taenia asiatica</i>               | U.D.    |
| 4    |           | <i>Proteus mirabilis</i>          | U.D.    | 31   |           | <i>Taenia solium</i>                 | U.D.    |
| 5    |           | <i>Pseudomonas aeruginosa</i>     | U.D.    | 32   |           | <i>Taenia saginata</i>               | U.D.    |
| 6    |           | <i>Escherichia coli</i>           | U.D.    | 33   |           | <i>Diphyllobothrium nihonkaiense</i> | U.D.    |
| 7    |           | <i>Lactobacillus acidophilus</i>  | U.D.    | 34   |           | <i>Plasmodium falciparum</i>         | U.D.    |
| 8    |           | <i>Bifidobacterium bifidum</i>    | U.D.    | 35   |           | <i>P. vivax</i>                      | U.D.    |
| 9    |           | <i>Enterobacter aerogenes</i>     | U.D.    | 36   |           | <i>P. ovale</i>                      | U.D.    |
| 10   |           | <i>Clostridium perfringens</i>    | U.D.    | 37   |           | <i>P. malariae</i>                   | U.D.    |
| 11   |           | <i>Enterococcus faecalis</i>      | U.D.    | 38   |           | <i>T. vaginalis</i>                  | U.D.    |
| 12   |           | <i>Shigella flexneri</i>          | U.D.    | 39   | Viruses   | Noro virus                           | U.D.    |
| 13   |           | <i>Klebsiella pneumoniae</i>      | U.D.    | 40   |           | Rota virus                           | U.D.    |
| 14   |           | <i>Campylobacter jejuni</i>       | U.D.    | 41   |           | HSV1                                 | U.D.    |
| 15   |           | <i>Candida albicans</i>           | U.D.    | 42   |           | HSV-2                                | U.D.    |
| 16   |           | <i>Filobasidiella neoformans</i>  | U.D.    | 43   |           | HAV                                  | U.D.    |
| 17   |           | <i>Staphylococcus epidermidis</i> | U.D.    | 44   |           | HBV                                  | U.D.    |
| 18   |           | <i>Aspergillus fumigatus</i>      | U.D.    | 45   |           | HCV                                  | U.D.    |
| 19   |           | <i>Staphylococcus aureus</i>      | U.D.    | 46   |           | EBV                                  | U.D.    |
| 20   |           | <i>Mycobacterium tuberculosis</i> | U.D.    | 47   |           | JEV                                  | U.D.    |
| 21   |           | <i>M. intracellulare</i>          | U.D.    | 48   |           | Enterovirus 70                       | U.D.    |
| 22   |           | <i>M. abscessus</i>               | U.D.    | 49   |           | Enterovirus 71                       | U.D.    |
| 23   |           | <i>M. hominis</i>                 | U.D.    | 50   |           | BKV                                  | U.D.    |
| 24   |           | <i>Chlamydia trachomatis</i>      | U.D.    | 51   |           | Dengue virus 2                       | U.D.    |
| 25   |           | <i>Neisseria gonorrhoeae</i>      | U.D.    | 52   |           | Dengue virus 3                       | U.D.    |

|           |  |                          |      |    |  |                  |      |
|-----------|--|--------------------------|------|----|--|------------------|------|
| <b>26</b> |  | <i>Ureaplasma parvum</i> | U.D. | 53 |  | Dengue virus 4   | U.D. |
| <b>27</b> |  | <i>U. urealyticum</i>    | U.D. | 54 |  | Human adenovirus | U.D. |

U.D. = undetected
