# Supplementary material for: Multiplex Real-Time PCR Assay Targeting Eight Parasites Customized to the Korean Population: Potential Use for Detection in Diarrheal Stool Samples from Gastroenteritis Patients
Source: PubMed Central journal article supplement (PMC5115832; doi:10.1371/journal.pone.0166957), 2016-11-18
Supplement: pone.0166957.s005.pdf [file pone.0166957.s005.pdf]

|                      |       |       |       |       |       |       |       |       |  |
|----------------------|-------|-------|-------|-------|-------|-------|-------|-------|--|
| <b>0.2 IU</b>        | 38.05 | U.D.  | U.D.  | U.D.  | U.D.  | U.D.  | 37.51 | 39.86 |  |
| <b>0.1 IU</b>        | 32.73 | 33.47 | 33.35 | 33.3  | 37.13 | 32.56 | 32.2  | 36.75 |  |
| <b>0.05 IU</b>       | 32.8  | 33.43 | 33.32 | 33.16 | 36.51 | 32.34 | 31.71 | 37.33 |  |
| <b>Negative</b>      | 32.62 | 33.35 | 32.62 | 33.04 | 36.49 | 32.11 | 31.31 | 37.31 |  |
| <b>Acetaminophen</b> |       |       |       |       |       |       |       |       |  |
| <b>200 µg/mL</b>     | 34.12 | 34.27 | 32.98 | 34.75 | 33.71 | 32.62 | 32.73 | 33.66 |  |
| <b>100 µg/mL</b>     | 32.64 | 33.53 | 33.14 | 34.79 | 32.84 | 32.47 | 31.99 | 33.74 |  |
| <b>50 µg/mL</b>      | 32.42 | 32.88 | 33.2  | 33.37 | 32.46 | 30.02 | 31.29 | 33.37 |  |
| <b>Negative</b>      | 32.71 | 32.52 | 33.73 | 32.95 | 32.38 | 32.81 | 32.85 | 32.98 |  |
| <b>Ibuprofen</b>     |       |       |       |       |       |       |       |       |  |
| <b>200 µg/mL</b>     | 34.12 | 34.27 | 32.98 | 34.75 | 33.71 | 32.62 | 32.73 | 33.66 |  |
| <b>100 µg/mL</b>     | 32.64 | 33.53 | 33.14 | 34.79 | 32.84 | 32.47 | 31.99 | 33.74 |  |
| <b>50 µg/mL</b>      | 32.42 | 32.88 | 33.2  | 33.37 | 32.46 | 30.02 | 31.29 | 33.37 |  |
| <b>Negative</b>      | 32.71 | 32.52 | 33.73 | 32.95 | 32.38 | 32.81 | 32.85 | 32.98 |  |

U.D. = undetected
