# Supplementary material for: Multiplex Real-Time PCR Assay Targeting Eight Parasites Customized to the Korean Population: Potential Use for Detection in Diarrheal Stool Samples from Gastroenteritis Patients
Source: PubMed Central journal article supplement (PMC5115832; doi:10.1371/journal.pone.0166957), 2016-11-18
Supplement: pone.0166957.s006.pdf [file pone.0166957.s006.pdf]

**S4 Table. Sensitivity and specificity of microscopic examination and multiplex qPCR in detection of the targeted parasites in this study**

| Final identification                      | No. of positive specimens | Microscopy                                   |                                              | Multiple qPCR                                |                                              |
|-------------------------------------------|---------------------------|----------------------------------------------|----------------------------------------------|----------------------------------------------|----------------------------------------------|
|                                           |                           | Sensitivity (%)<br>[95% confidence interval] | Specificity (%)<br>[95% confidence interval] | Sensitivity (%)<br>[95% confidence interval] | Specificity (%)<br>[95% confidence interval] |
| <i>Blastocystis hominis</i>               | 8                         | 0% [0.0-36.94]                               | 100% [96.84-100.0]                           | 100% [63.06-100.0]                           | [96.84-100.0]                                |
| <i>Cryptosporidium parvum</i>             | 1                         | 0% [0.0-97.50]                               | 100% [97.02-100.0]                           | 100% [2.50-100.0]                            | [97.02-100.0]                                |
| <i>Clonorchis sinensis</i>                | 2                         | 50% [1.26-98.74]                             | 100% [97.00-100.0]                           | 100% [15.81-100.0]                           | [97.00-100.0]                                |
| <i>Entamoeba histolytica</i> <sup>a</sup> | 2                         | 100% [15.81-100.0]                           | 100% [97.00-100.0]                           | 100% [15.81-100.0]                           | [97.00-100.0]                                |
| <i>Giardia lamblia</i> <sup>a</sup>       | 2                         | 100% [15.81-100.0]                           | 100% [97.00-100.0]                           | 100% [15.81-100.0]                           | [97.00-100.0]                                |
| <i>Gymnophalloides seoi</i> <sup>a</sup>  | 2                         | 0% [0.0-84.19]                               | 100% [97.00-100.0]                           | 100% [15.81-100.0]                           | [97.00-100.0]                                |
| <i>Metagonimus yokogawai</i>              | 0                         | N.A.                                         | 100% [97.00-100.0]                           | N.A.                                         | [97.00-100.0]                                |
| <i>Dientamoeba fragilis</i>               | 0                         | N.A.                                         | 100% [97.00-100.0]                           | N.A.                                         | [97.00-100.0]                                |

<sup>a</sup> The six positive controls include 2 of *Entamoeba histolytica*, 2 of *Giardia lamblia*, and 2 of *Gymnophalloides seoi*; N.A. = not available.
